# Supplementary material
Source: PubMed Central journal article supplement (PMC3660509)
Supplement: NIHMS464134-supplement-1_si_001.pdf [file NIHMS464134-supplement-1_si_001.pdf]

# **Does Dietary Copper Supplementation enhance or diminish PCB126 Toxicity in Rodent Liver?**

Running Head (limit 50 characters, currently 43) Copper Supplementation and PCB126 Toxicity

Ian K. Lai<sup>1,2</sup>, Klaren, William<sup>1,2</sup>, Miao Li<sup>1,2</sup>, Brian Wels<sup>3</sup>, Donald L. Simmons<sup>3</sup>, Alicia K. Olivier<sup>4</sup>, Wanda M. Haschek<sup>5</sup>, Kai Wang<sup>6</sup>, Gabriele Ludewig<sup>1,2</sup>, and Larry W. Robertson<sup>1,2,\*</sup>

<sup>1</sup>Interdisciplinary Graduate Program in Human Toxicology, University of Iowa

<sup>2</sup>Department of Occupational and Environmental Health, College of Public Health, University of Iowa

<sup>3</sup>State Hygienic Laboratory, University of Iowa

<sup>4</sup>Department of Pathology, University of Iowa

<sup>5</sup>Department of Pathobiology, University of Illinois

<sup>6</sup>Department of Biostatistics, College of Public Health, University of Iowa

\*Corresponding Author:

Larry W. Robertson, Ph.D., M.P.H., Professor  
Department of Occupational and  
Environmental Health  
The University of Iowa, College of Public Health  
100 Oakdale Campus #219 IREH  
Iowa City, Iowa 52242-5000  
Phone: 319-335-4346  
Fax: 319-335-4225  
E-mail: [larry-robertson@uiowa.edu](mailto:larry-robertson@uiowa.edu)

## Supplemental Data

**Supplemental Table 1:** Composition of AIN-93G modified copper diets

| <b>Diet Constituent</b>  | <b>Low Cu<br/>(2 ppm)<br/>g/kg</b> | <b>Adequate Cu<br/>(6 ppm)<br/>g/kg</b> | <b>Supplemental Cu<br/>(10 ppm)<br/>g/kg</b> |
|--------------------------|------------------------------------|-----------------------------------------|----------------------------------------------|
| Casein, low Cu & Fe      | 200                                | 200                                     | 200                                          |
| L-Cystine                | 3.0                                | 3.0                                     | 3.0                                          |
| Corn Starch              | 397                                | 397                                     | 397                                          |
| Maltodextrin             | 132                                | 132                                     | 132                                          |
| Sucrose                  | 100                                | 100                                     | 100                                          |
| Soybean Oil              | 70.0                               | 70.0                                    | 70.0                                         |
| Cellulose                | 50.0                               | 50.0                                    | 50.0                                         |
| Cu Deficient Mineral Mix | 35.0                               | 35.0                                    | 35.0                                         |
| Cupric Carbonate         | 0.0036                             | 0.0108                                  | 0.0180                                       |
| Vitamin Mix, AIN-93-VX   | 10.0                               | 10.0                                    | 10.0                                         |
| Choline Bitartrate       | 2.5                                | 2.5                                     | 2.5                                          |
| THBQ, antioxidant        | 0.014                              | 0.014                                   | 0.014                                        |

**Supplemental Table 2:** Primer sequences used in hepatic metalloprotein gene expression determination

|                           | <b>Forward</b>              | <b>Reverse</b>              |
|---------------------------|-----------------------------|-----------------------------|
| Ceruloplasmin             | 5'-tcttgaatccttggtcctg-3'   | 5'-tcttggggacagtcattc-3'    |
| Tyrosinase                | 5'-aaccaggggccttgcttct-3'   | 5'-ggcatgaggggctggccattg-3' |
| CytOx (Subunit I)         | 5'-ggagctggaacaggatgaac-3'  | 5'-gagaggtgtctgatattggg-3'  |
| CytOx (Subunit IV)        | 5'-acttcggtgtgccttcggg-3'   | 5'-aaaggctgtccagtcggc-3'    |
| Metallothionein Isoform 1 | 5'-caccgttgctccagattcac-3'  | 5'-gcagcagcactgttcgtcac-3'  |
| Metallothionein Isoform 2 | 5'-atctccaactgccgctcc-3'    | 5'-tgcactgtccgaagcctct-3'   |
| B-actin                   | 5'-tagagccaccaatccacacag-3' | 5'-cagccttcttctgggtatg-3'   |

**Supplemental Table 3a:** Liver ( $\mu\text{g/g}$ ), kidney ( $\mu\text{g/g}$ ), and blood selenium ( $\mu\text{g/L}$ ) under each experiment condition and significance of various comparisons (adjusted using Dunnett's test)

| Treatment                                     | Liver Selenium ( $\mu\text{g/g}$ tissue wet weight) |                            |                            |         | Kidney Selenium ( $\mu\text{g/g}$ tissue wet weight) |                          |                          |         | Blood Selenium ( $\mu\text{g/L}$ ) |                       |                       |         |
|-----------------------------------------------|-----------------------------------------------------|----------------------------|----------------------------|---------|------------------------------------------------------|--------------------------|--------------------------|---------|------------------------------------|-----------------------|-----------------------|---------|
|                                               | Dietary Copper Level                                |                            |                            | Overall | Dietary Copper Level                                 |                          |                          | Overall | Dietary Copper Level               |                       |                       | Overall |
|                                               | Low (2 ppm)                                         | Adequate (6 ppm)           | High (10 ppm)              |         | Low (2 ppm)                                          | Adequate (6 ppm)         | High (10 ppm)            |         | Low (2 ppm)                        | Adequate (6 ppm)      | High (10 ppm)         |         |
| <b>Corn Oil</b>                               | 0.617 $\pm$ 0.026<br>(-,*)                          | 0.784 $\pm$ 0.031<br>(-,-) | 0.663 $\pm$ 0.026<br>(-,*) | -       | 0.89 $\pm$ 0.36<br>(-,-)                             | 0.97 $\pm$ 0.03<br>(-,-) | 1.09 $\pm$ 0.02<br>(-,*) | -       | 418 $\pm$ 14<br>(-,-)              | 412 $\pm$ 20<br>(-,-) | 418 $\pm$ 23<br>(-,-) | -       |
| <b>1 <math>\mu\text{mol/kg}</math> PCB126</b> | 0.460 $\pm$ 0.017<br>(†,-)                          | 0.488 $\pm$ 0.027<br>(†,-) | 0.502 $\pm$ 0.019<br>(†,-) | †       | 0.90 $\pm$ 0.02<br>(-,-)                             | 0.97 $\pm$ 0.03<br>(-,-) | 1.05 $\pm$ 0.05<br>(-,-) | -       | 443 $\pm$ 8<br>(-,*)               | 377 $\pm$ 13<br>(-,-) | 392 $\pm$ 15<br>(-,-) | -       |
| <b>5 <math>\mu\text{mol/kg}</math> PCB126</b> | 0.421 $\pm$ 0.014<br>(†,-)                          | 0.443 $\pm$ 0.021<br>(†,-) | 0.502 $\pm$ 0.020<br>(†,*) | †       | 0.99 $\pm$ 0.02<br>(†,*)                             | 1.15 $\pm$ 0.03<br>(†,-) | 1.14 $\pm$ 0.04<br>(-,-) | †       | 455 $\pm$ 13<br>(-,*)              | 402 $\pm$ 13<br>(-,-) | 407 $\pm$ 10<br>(-,-) | -       |
| <b>Overall</b>                                | *                                                   | -                          | -                          |         | *                                                    | -                        | *                        |         | *                                  | -                     | -                     |         |

Results are expressed as mean  $\pm$  SEM. Each group contained 4-6 animals. One-way ANOVA was used to examine the difference between each PCB126 level and the corn oil treatment, “†” in the parentheses indicates a significant difference due to PCB treatment. Similarly, a “\*” in the parentheses indicates significant differences between low or supplemental and the adequate dietary copper level. Significance for each factor based on two-way ANOVA is indicated in the bottom margin for copper diet (\*) and in the right margin for PCB treatment (†). The level for significance is 0.05.

**Supplemental Table 3b:** Liver ( $\mu\text{g/g}$ ), kidney ( $\mu\text{g/g}$ ), and blood iron ( $\text{mg/L}$ ) under each experiment condition and significance of various comparisons (adjusted using Dunnett's test)

| Treatment                                         | Liver Iron ( $\mu\text{g/g}$ tissue wet weight) |                      |                      |         | Kidney Iron ( $\mu\text{g/g}$ tissue wet weight) |                        |                        |         | Blood Iron ( $\text{mg/L}$ ) |                      |                      |         |
|---------------------------------------------------|-------------------------------------------------|----------------------|----------------------|---------|--------------------------------------------------|------------------------|------------------------|---------|------------------------------|----------------------|----------------------|---------|
|                                                   | Dietary Copper Level                            |                      |                      | Overall | Dietary Copper Level                             |                        |                        | Overall | Dietary Copper Level         |                      |                      | Overall |
|                                                   | Low<br>(2 ppm)                                  | Adequate<br>(6 ppm)  | High<br>(10 ppm)     |         | Low<br>(2 ppm)                                   | Adequate<br>(6 ppm)    | High<br>(10 ppm)       |         | Low<br>(2 ppm)               | Adequate<br>(6 ppm)  | High<br>(10 ppm)     |         |
| <b>Corn Oil</b>                                   | 115 $\pm$ 2<br>(-,*)                            | 137 $\pm$ 8<br>(-,)  | 133 $\pm$ 5<br>(-,)  | -       | 78.2 $\pm$ 3.4<br>(-,)                           | 74.7 $\pm$ 2.4<br>(-,) | 83.4 $\pm$ 4.6<br>(-,) | -       | 510 $\pm$ 18<br>(-,)         | 517 $\pm$ 30<br>(-,) | 552 $\pm$ 22<br>(-,) | -       |
| <b>1 <math>\mu\text{mol/kg}</math><br/>PCB126</b> | 112 $\pm$ 12<br>(-,)                            | 107 $\pm$ 6<br>(†,-) | 106 $\pm$ 5<br>(†,-) | †       | 71.7 $\pm$ 3.9<br>(-,)                           | 78.1 $\pm$ 4.8<br>(-,) | 82.5 $\pm$ 8.8<br>(-,) | -       | 452 $\pm$ 30<br>(-,)         | 513 $\pm$ 35<br>(-,) | 547 $\pm$ 24<br>(-,) | -       |
| <b>5 <math>\mu\text{mol/kg}</math><br/>PCB126</b> | 106 $\pm$ 10<br>(-,)                            | 107 $\pm$ 3<br>(†,-) | 100 $\pm$ 7<br>(†,-) | †       | 71.5 $\pm$ 5.3<br>(-,*)                          | 87.7 $\pm$ 5.2<br>(-,) | 78.1 $\pm$ 2.5<br>(-,) | -       | 425 $\pm$ 11<br>(†,*)        | 522 $\pm$ 26<br>(-,) | 470 $\pm$ 32<br>(-,) | †       |
| <b>Overall</b>                                    | -                                               | -                    | -                    |         | -                                                | -                      | -                      |         | *                            | -                    | -                    |         |

Results are expressed as mean  $\pm$  SEM. Each group contained 4-6 animals. One-way ANOVA was used to examine the difference between each PCB126 level and the corn oil treatment, “†” in the parentheses indicates a significant difference due to PCB treatment. Similarly, a “\*” in the parentheses indicates significant differences between low or supplemental and the adequate dietary copper level. Significance for each factor based on two-way ANOVA is indicated in the bottom margin for copper diet (\*) and in the right margin for PCB treatment (†). The level for significance is 0.05.



**Supplemental Table 3c:** Liver ( $\mu\text{g/g}$ ), kidney ( $\mu\text{g/g}$ ), and blood zinc ( $\text{mg/L}$ ) under each experiment condition and significance of various comparisons (adjusted using Dunnett's test)

| Treatment                                         | Liver Zinc ( $\mu\text{g/g}$ tissue wet weight) |                         |                         |         | Kidney Zinc ( $\mu\text{g/g}$ tissue wet weight) |                         |                         |         | Blood Zinc ( $\text{mg/L}$ ) |                          |                          |         |
|---------------------------------------------------|-------------------------------------------------|-------------------------|-------------------------|---------|--------------------------------------------------|-------------------------|-------------------------|---------|------------------------------|--------------------------|--------------------------|---------|
|                                                   | Dietary Copper Level                            |                         |                         | Overall | Dietary Copper Level                             |                         |                         | Overall | Dietary Copper Level         |                          |                          | Overall |
|                                                   | Low<br>(2 ppm)                                  | Adequate<br>(6 ppm)     | High<br>(10 ppm)        |         | Low<br>(2 ppm)                                   | Adequate<br>(6 ppm)     | High<br>(10 ppm)        |         | Low<br>(2 ppm)               | Adequate<br>(6 ppm)      | High<br>(10 ppm)         |         |
| <b>Corn Oil</b>                                   | 27.0 $\pm$ 0.8<br>(-,*)                         | 30.9 $\pm$ 0.7<br>(-,-) | 30.4 $\pm$ 1.0<br>(-,-) | -       | 19.6 $\pm$ 0.5<br>(-,-)                          | 19.8 $\pm$ 0.4<br>(-,-) | 21.8 $\pm$ 0.6<br>(-,*) | -       | 6.58 $\pm$ 0.13<br>(-,-)     | 6.40 $\pm$ 0.15<br>(-,-) | 6.67 $\pm$ 0.31<br>(-,-) | -       |
| <b>1 <math>\mu\text{mol/kg}</math><br/>PCB126</b> | 24.5 $\pm$ 0.5<br>(-,-)                         | 25.8 $\pm$ 0.4<br>(†,-) | 29.2 $\pm$ 1.6<br>(-,*) | †       | 19.5 $\pm$ 0.4<br>(-,-)                          | 20.8 $\pm$ 0.4<br>(-,-) | 21.2 $\pm$ 1.2<br>(-,-) | -       | 5.98 $\pm$ 0.17<br>(-,-)     | 5.68 $\pm$ 0.26<br>(-,-) | 5.95 $\pm$ 0.20<br>(-,-) | †       |
| <b>5 <math>\mu\text{mol/kg}</math><br/>PCB126</b> | 22.6 $\pm$ 1.1<br>(†,-)                         | 25.1 $\pm$ 1.1<br>(†,-) | 26.9 $\pm$ 1.0<br>(-,-) | †       | 20.2 $\pm$ 0.3<br>(-,*)                          | 22.6 $\pm$ 0.5<br>(†,-) | 21.5 $\pm$ 0.5<br>(-,-) | -       | 5.82 $\pm$ 0.28<br>(†,-)     | 6.08 $\pm$ 0.25<br>(-,-) | 6.07 $\pm$ 0.28<br>(-,-) | †       |
| <b>Overall</b>                                    | -                                               | -                       | *                       |         | *                                                | -                       | -                       |         | -                            | -                        | -                        |         |

Results are expressed as mean  $\pm$  SEM. Each group contained 4-6 animals. One-way ANOVA was used to examine the difference between each PCB126 level and the corn oil treatment, “†” in the parentheses indicates a significant difference due to PCB treatment. Similarly, a “\*” in the parentheses indicates significant differences between low or supplemental and the adequate dietary copper level. Significance for each factor based on two-way ANOVA is indicated in the bottom margin for copper diet (\*) and in the right margin for PCB treatment (†). The level for significance is 0.05.

**Supplemental Table 3d:** Liver ( $\mu\text{g/g}$ ), kidney ( $\mu\text{g/g}$ ), and blood manganese ( $\mu\text{g/L}$ ) under each experiment condition and significance of various comparisons (adjusted using Dunnett's test)

| Treatment                                         | Liver Manganese ( $\mu\text{g/g}$ tissue wet weight) |                          |                          |         | Kidney Manganese ( $\mu\text{g/g}$ tissue wet weight) |                          |                          |         | Blood Manganese ( $\mu\text{g/L}$ ) |                          |                          |         |
|---------------------------------------------------|------------------------------------------------------|--------------------------|--------------------------|---------|-------------------------------------------------------|--------------------------|--------------------------|---------|-------------------------------------|--------------------------|--------------------------|---------|
|                                                   | Dietary Copper Level                                 |                          |                          | Overall | Dietary Copper Level                                  |                          |                          | Overall | Dietary Copper Level                |                          |                          | Overall |
|                                                   | Low<br>(2 ppm)                                       | Adequate<br>(6 ppm)      | High<br>(10 ppm)         |         | Low<br>(2 ppm)                                        | Adequate<br>(6 ppm)      | High<br>(10 ppm)         |         | Low<br>(2 ppm)                      | Adequate<br>(6 ppm)      | High<br>(10 ppm)         |         |
| <b>Corn Oil</b>                                   | 2.15 $\pm$ 0.07<br>(-,*)                             | 2.52 $\pm$ 0.03<br>(-,-) | 2.39 $\pm$ 0.10<br>(-,-) | -       | 0.91 $\pm$ 0.03<br>(-,-)                              | 0.93 $\pm$ 0.03<br>(-,-) | 1.05 $\pm$ 0.04<br>(-,-) | -       | 10.16 $\pm$ 0.35<br>(-,*)           | 8.38 $\pm$ 0.55<br>(-,-) | 8.76 $\pm$ 0.50<br>(-,-) | -       |
| <b>1 <math>\mu\text{mol/kg}</math><br/>PCB126</b> | 1.67 $\pm$ 0.03<br>(†,-)                             | 1.69 $\pm$ 0.07<br>(†,-) | 1.90 $\pm$ 0.10<br>(†,-) | †       | 0.90 $\pm$ 0.01<br>(-,-)                              | 0.88 $\pm$ 0.02<br>(-,-) | 0.96 $\pm$ 0.05<br>(-,-) | -       | 9.39 $\pm$ 0.54<br>(-,*)            | 6.75 $\pm$ 0.46<br>(-,-) | 8.16 $\pm$ 0.62<br>(-,-) | †       |
| <b>5 <math>\mu\text{mol/kg}</math><br/>PCB126</b> | 1.55 $\pm$ 0.10<br>(†,-)                             | 1.79 $\pm$ 0.06<br>(†,-) | 1.81 $\pm$ 0.09<br>(†,-) | †       | 0.95 $\pm$ 0.02<br>(-,-)                              | 1.03 $\pm$ 0.02<br>(-,*) | 1.04 $\pm$ 0.06<br>(-,-) | -       | 9.53 $\pm$ 0.54<br>(-,-)            | 8.18 $\pm$ 0.69<br>(-,-) | 7.34 $\pm$ 0.49<br>(-,-) | -       |
| <b>Overall</b>                                    | *                                                    | -                        | -                        |         | -                                                     | -                        | -                        |         | *                                   | -                        | -                        |         |

Results are expressed as mean  $\pm$  SEM. Each group contained 4-6 animals. One-way ANOVA was used to examine the difference between each PCB126 level and the corn oil treatment, “†” in the parentheses indicates a significant difference due to PCB treatment. Similarly, a “\*” in the parentheses indicates significant differences between low or supplemental and the adequate dietary copper level. Significance for each factor based on two-way ANOVA is indicated in the bottom margin for copper diet (\*) and in the right margin for PCB treatment (†). The level for significance is 0.05.

## Legends to the Supplemental Figures:

**Supplemental Figure 1:** Growth (a) and feed consumption (b) of vehicle- (Corn Oil) and PCB126- (1  $\mu\text{mol/kg}$  and 5  $\mu\text{mol/kg}$ ) treated animals. Growth is defined as the weight gained relative to initial weight. High (5  $\mu\text{mol/kg}$ ) dose PCB126 significantly slowed growth relative to vehicle-treated control indicating acute toxicity. Feed consumption is defined as total feed consumed in grams following injection. PCB126 diminished feed consumption in a dose-dependent manner. Error bars represent SEM. †  $p < 0.05$  as compared to Corn Oil vehicle control.

**Supplemental Figure 2:** Liver 4-HNE levels of vehicle- (Corn Oil) and PCB126- (1  $\mu\text{mol/kg}$  and 5  $\mu\text{mol/kg}$ ) treated animals. Error bars represent SEM. \*  $p < 0.05$  as compared to adequate (6 ppm) dietary copper. †  $p < 0.05$  as compared to Corn vehicle control.

**Supplemental Figure 3a:** Electron micrograph from hepatocytes of a rat fed adequate (6 ppm) copper and treated with corn oil (vehicle). N, nucleus; M, mitochondria; R, rough endoplasmic reticulum; S, smooth endoplasmic reticulum.

**Supplemental Figure 3b:** Electron micrograph from hepatocytes of a rat fed adequate (6 ppm) copper and treated with low (1  $\mu\text{mol/kg}$ ) dose PCB126. N, nucleus; M, mitochondria; R, rough endoplasmic reticulum; S, smooth endoplasmic reticulum; L, lipid.

**Supplemental Figure 3c:** Electron micrograph from hepatocytes of a rat fed adequate (6 ppm) copper and treated with high (5  $\mu\text{mol/kg}$ ) dose PCB126. N, nucleus; M, mitochondria; R, rough endoplasmic reticulum; S, smooth endoplasmic reticulum; L, lipid.

(a: growth)

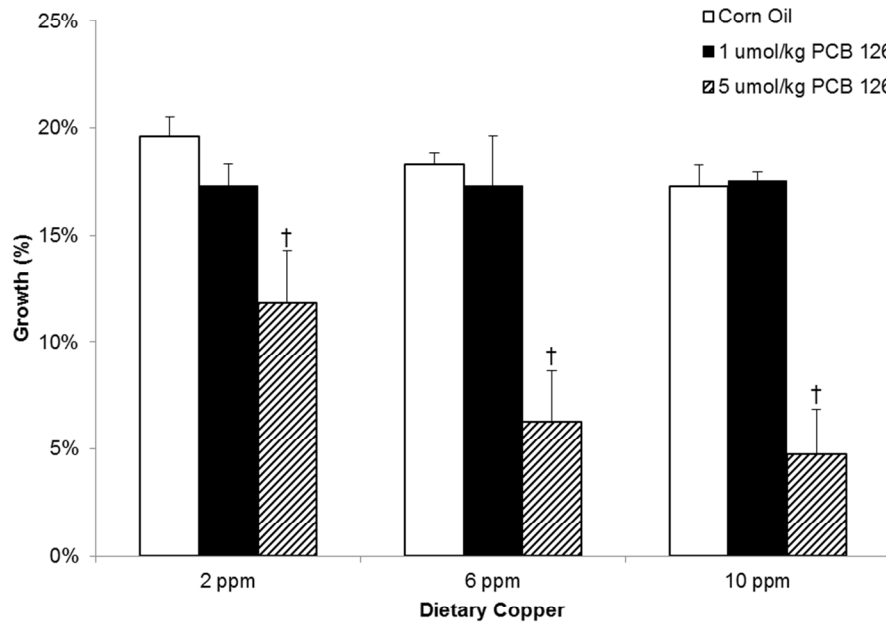

(b: feed consumption)

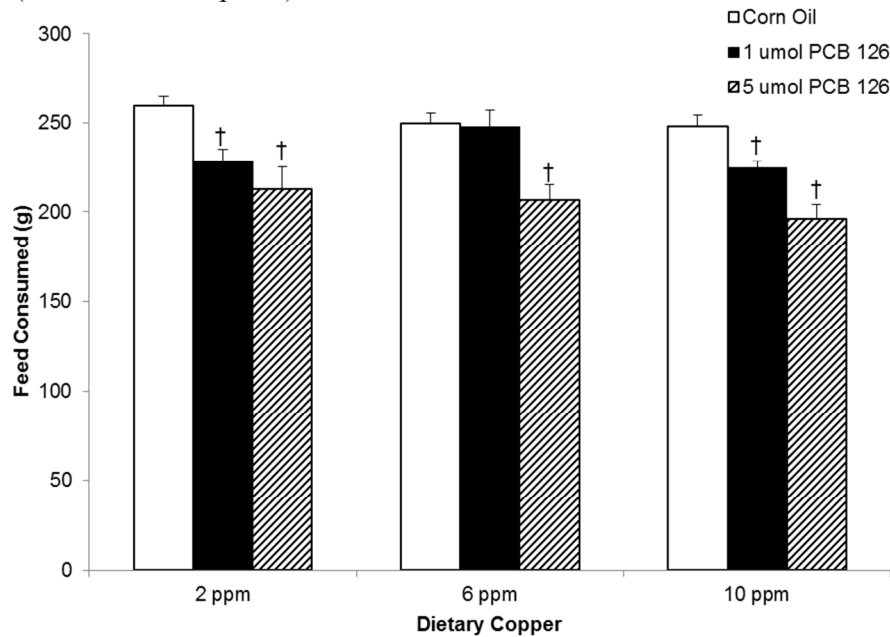

**Supplemental Figure 1:** Growth (a) and feed consumption (b) of vehicle- (Corn Oil) and PCB126- (1  $\mu\text{mol/kg}$  and 5  $\mu\text{mol/kg}$ ) treated animals. Growth is defined as the weight gained relative to initial weight. High (5  $\mu\text{mol/kg}$ ) dose PCB126 significantly slowed growth relative to vehicle-treated control indicating acute toxicity. Feed consumption is defined as total feed consumed in grams following injection. PCB126 diminished feed consumption in a dose-dependent manner. Error bars represent SEM. †  $p < 0.05$  as compared to Corn Oil vehicle control

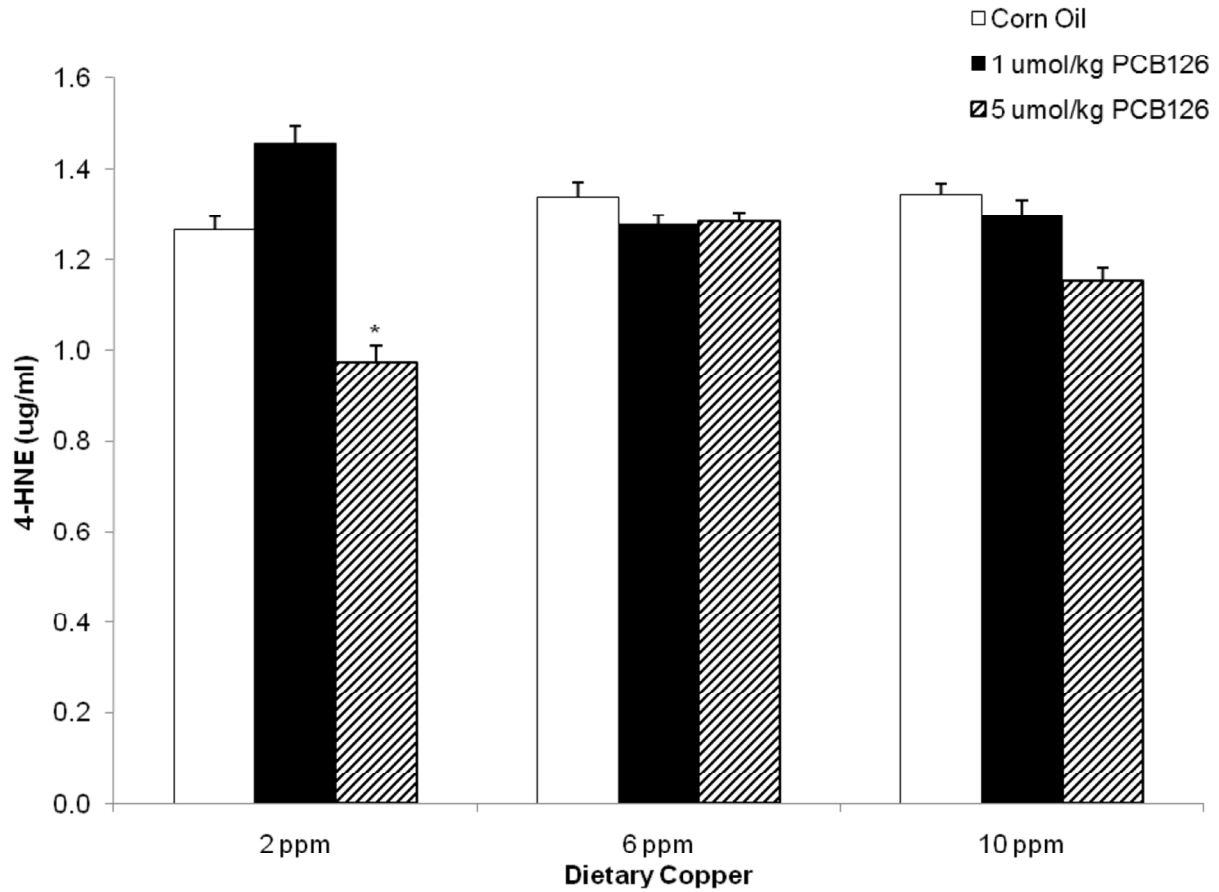

**Supplemental Figure 2:** Liver 4-HNE levels of vehicle- (Corn Oil) and PCB126- (1  $\mu\text{mol/kg}$  and 5  $\mu\text{mol/kg}$ ) treated animals. Error bars represent SEM. \*  $p < 0.05$  as compared to adequate (6 ppm) dietary copper. †  $p < 0.05$  as compared to Corn vehicle control.

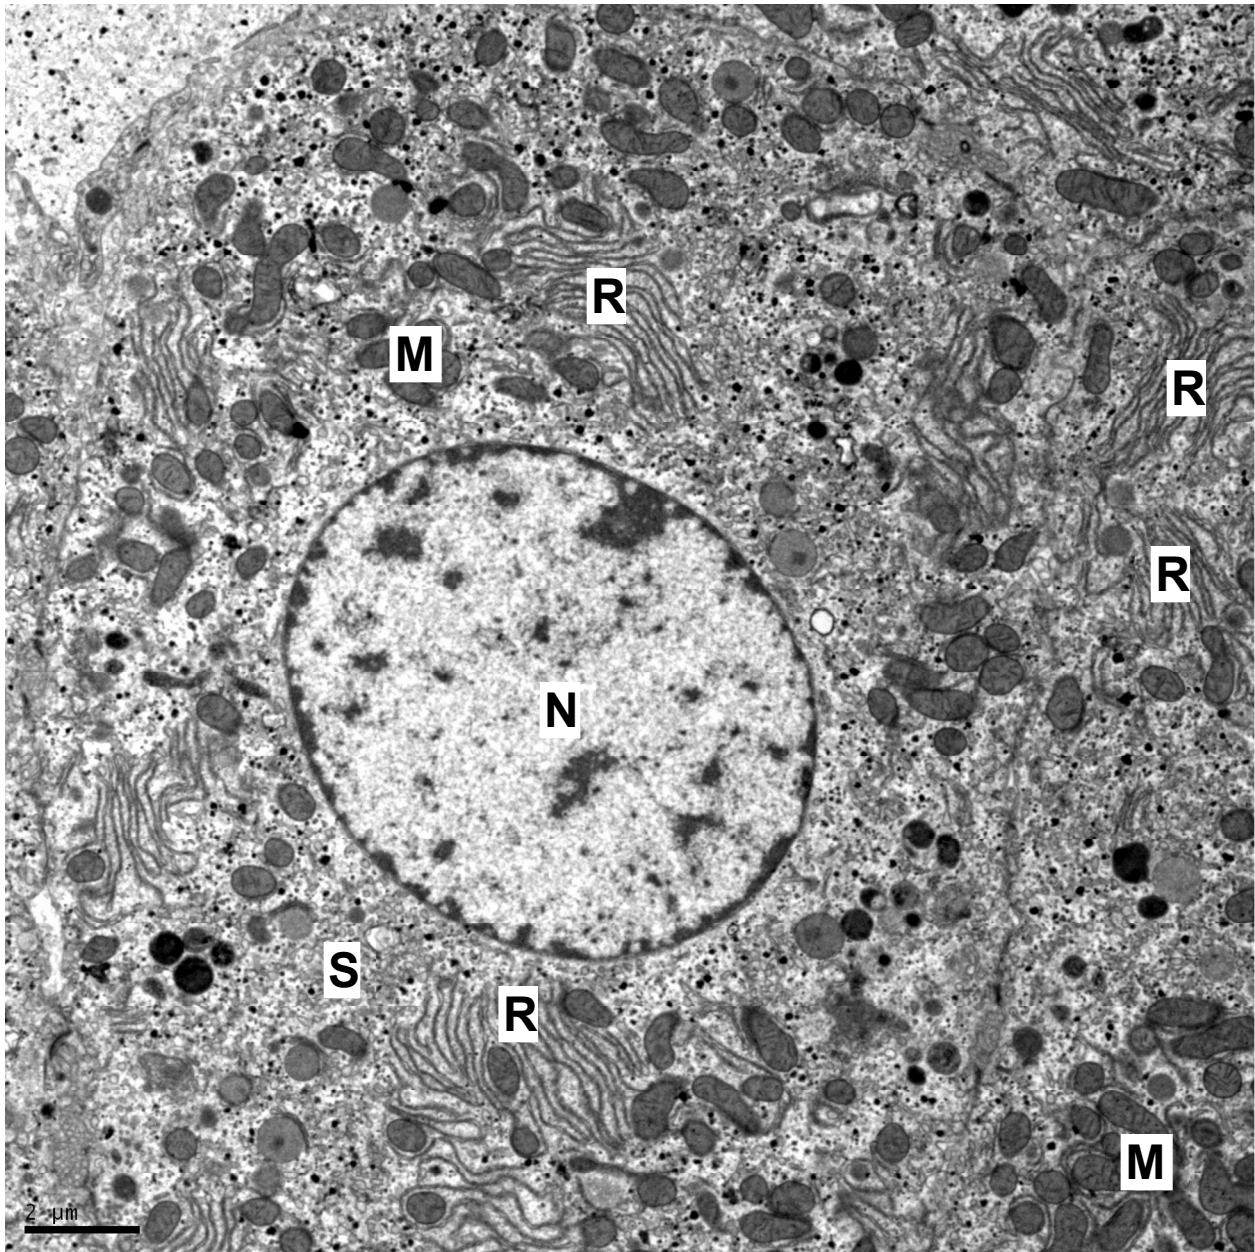

**Supplemental Figure 3a:** Electron micrograph from hepatocytes of a rat fed adequate (6 ppm) copper and treated with corn oil (vehicle). N, nucleus; M, mitochondria; R, rough endoplasmic reticulum; S, smooth endoplasmic reticulum.

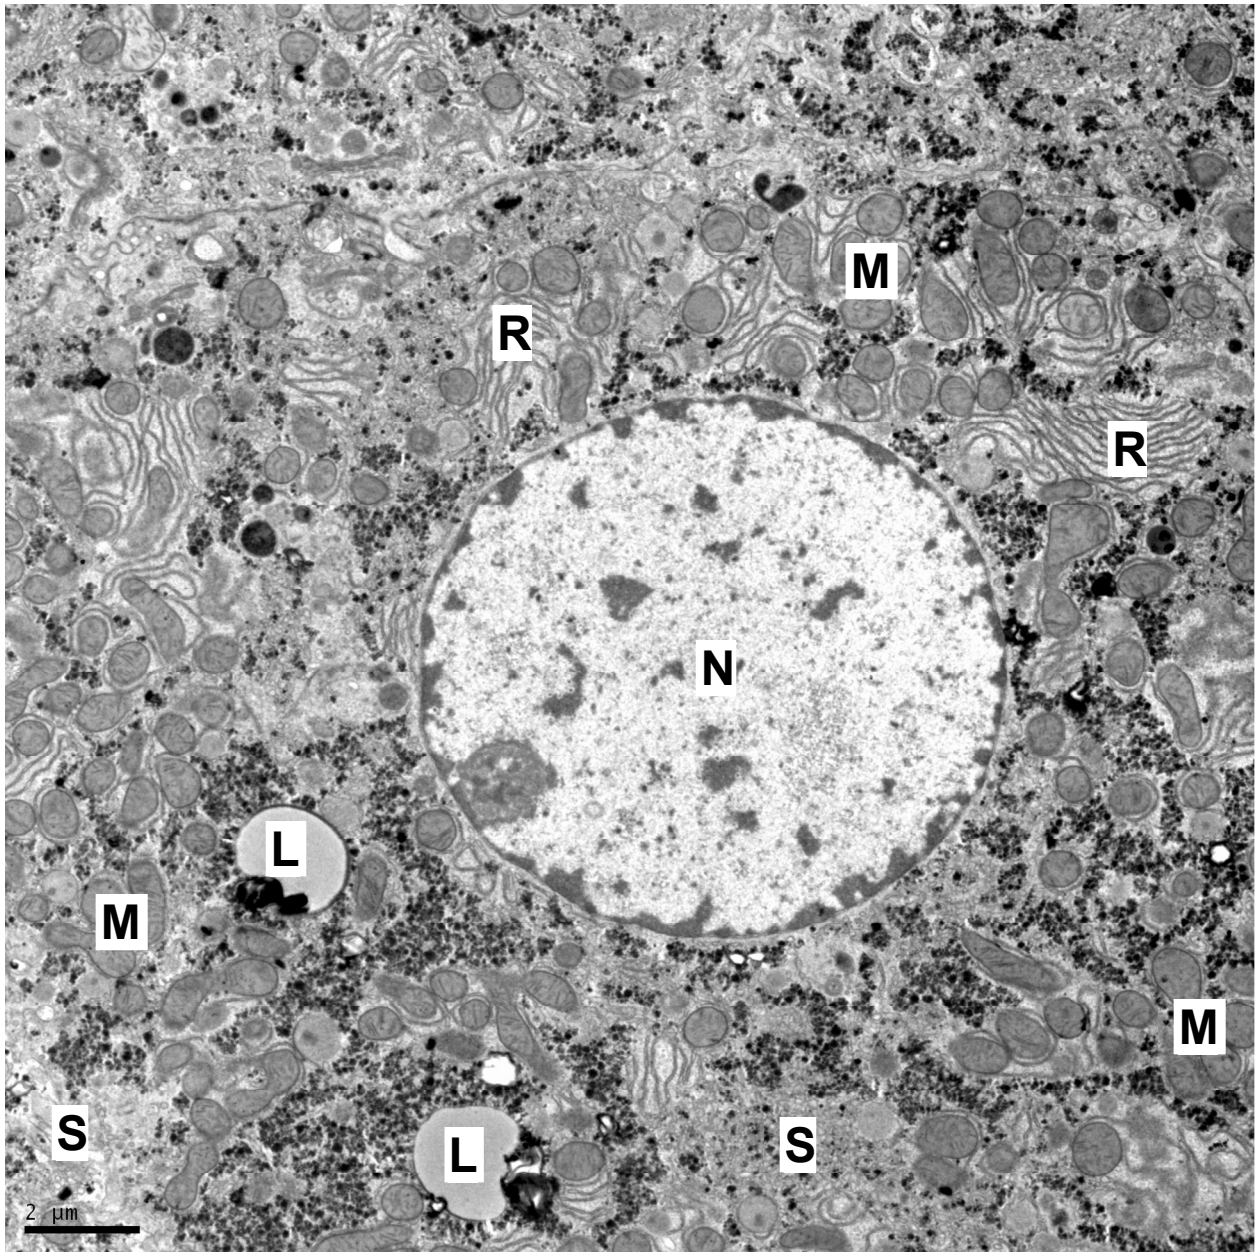

**Supplemental Figure 3b:** Electron micrograph from hepatocytes of a rat fed adequate (6 ppm) copper and treated with low (1  $\mu\text{mol/kg}$ ) dose PCB126. N, nucleus; M, mitochondria; R, rough endoplasmic reticulum; S, smooth endoplasmic reticulum; L, lipid.

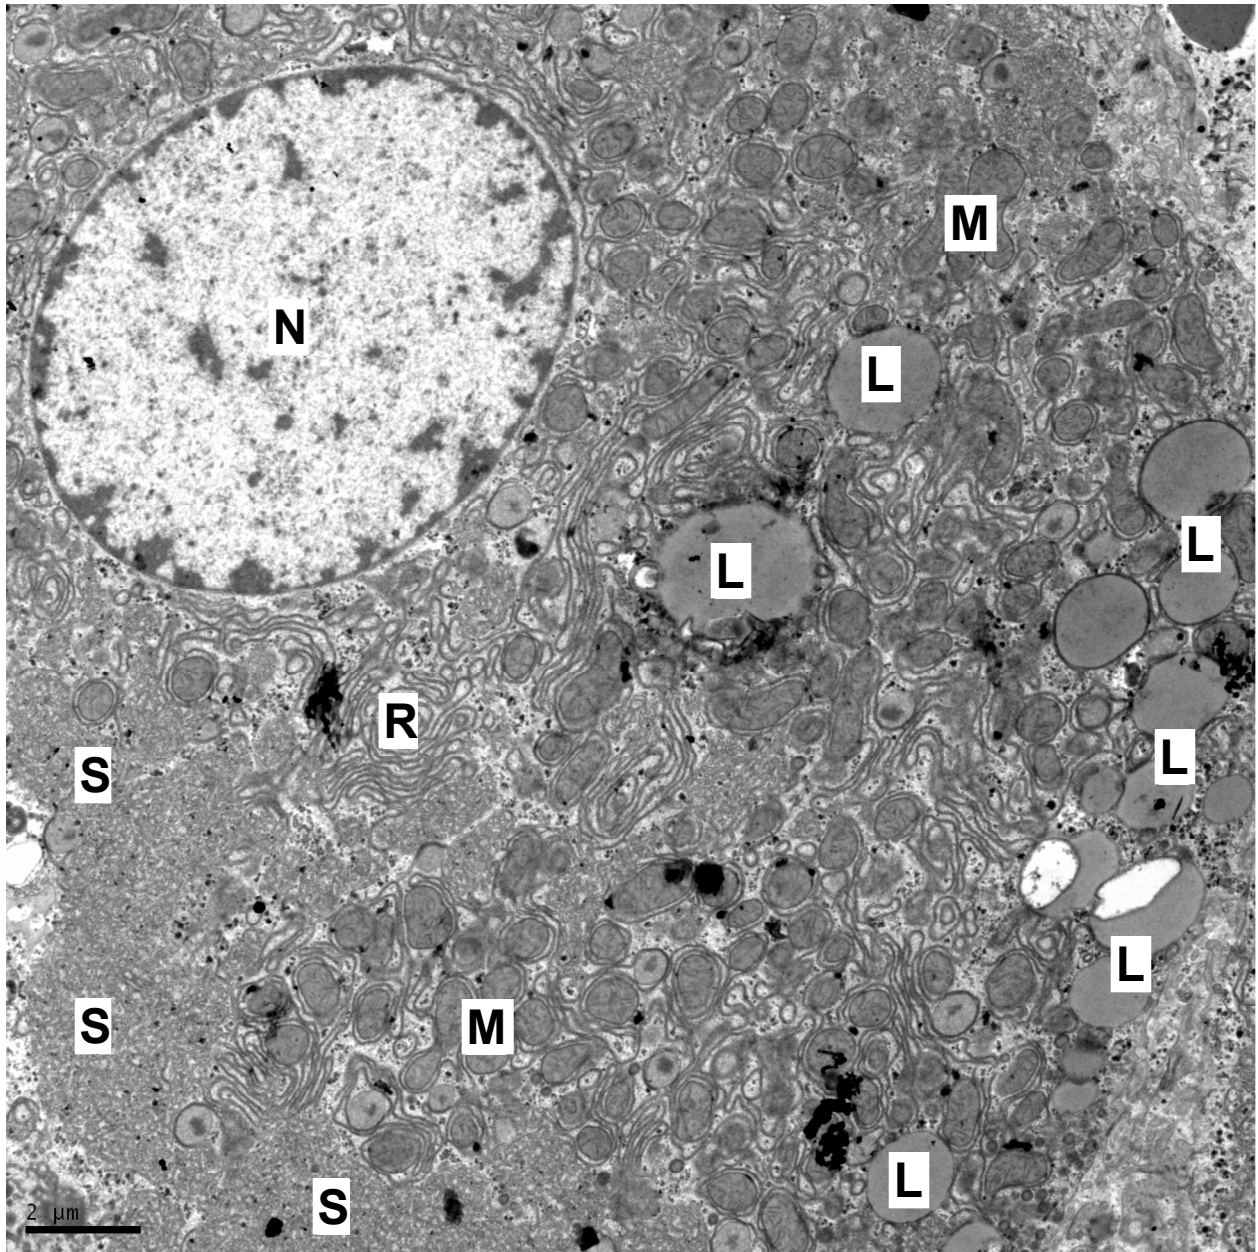

**Supplemental Figure 3c:** Electron micrograph from hepatocytes of a rat fed adequate (6 ppm) copper and treated with high (5  $\mu\text{mol/kg}$ ) dose PCB126. N, nucleus; M, mitochondria; R, rough endoplasmic reticulum; S, smooth endoplasmic reticulum; L, lipid.
